# Supplementary material for: Agonist antibodies activating the Met receptor protect cardiomyoblasts from cobalt chloride-induced apoptosis and autophagy
Source: PubMed Central journal article supplement — Cell Death Dis. 2014 Apr 17;5(4):e1185–. doi: 10.1038/cddis.2014.155 (PMC4001309; doi:10.1038/cddis.2014.155), 2014-04-17
Supplement: cddis2014155x1.pdf [file cddis2014155x1.pdf]

# Supplementary Figure S1

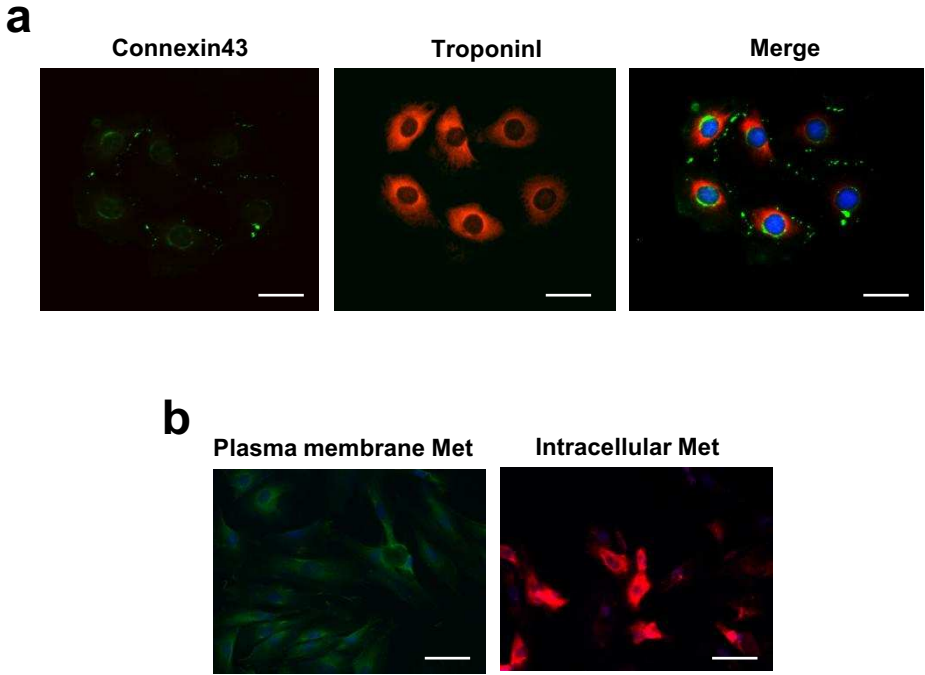

**Supplementary Figure S1** H9c2 rat cardiomyoblasts cell line. **(a)** Immunofluorescence of cardiac markers: Connexin43 (green) and Troponin-I (red). DAPI-stained nuclei in blue. **(b)** Plasma membrane (green) and intracellular (red) immunofluorescence of Met (see Materials and methods section). Nuclei in blue. Bar: 35µm.

## Supplementary Figure S2

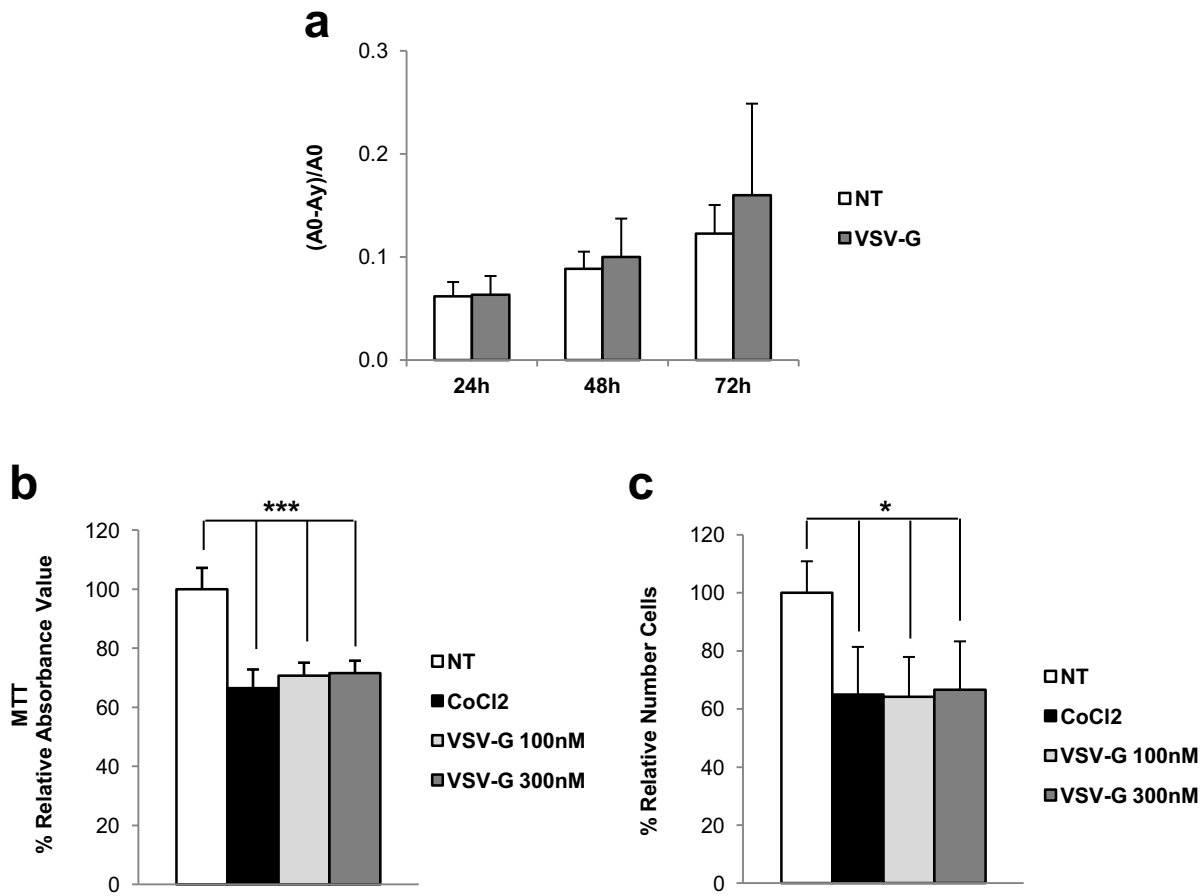

**Supplementary Figure S2** The cardioprotective activity mediated by Met agonist DN30 and DO24 is specific. **(a)** Wound healing assay in cells not treated (NT, white) or treated with VSV-G mAb (100nM, grey) for 24, 48 or 72 hours. T-test was calculated between treated vs NT samples at each time point and was never statistically significant. **(b-c)** Cells were untreated (NT, white), treated with 300 $\mu$ M CoCl<sub>2</sub> (black) or CoCl<sub>2</sub>+VSV-G (100nM: light grey, 300nM: dark grey). MAb was concomitantly added to CoCl<sub>2</sub> for 24h **(b)** and 48h **(c)**. Cell viability was measured by MTT assay **(b)** and cells were counted **(c)**. Results are expressed as the percentage of MTT or cell count reduction relative to NT. Values are the mean  $\pm$  SD calculated in three independent experiments. For T-test each group of samples was compared to CoCl<sub>2</sub>-treated cells, except for **(a)**. \* $p$ <0.05 and \*\*\* $p$ <0.005.

# Supplementary Figure S3

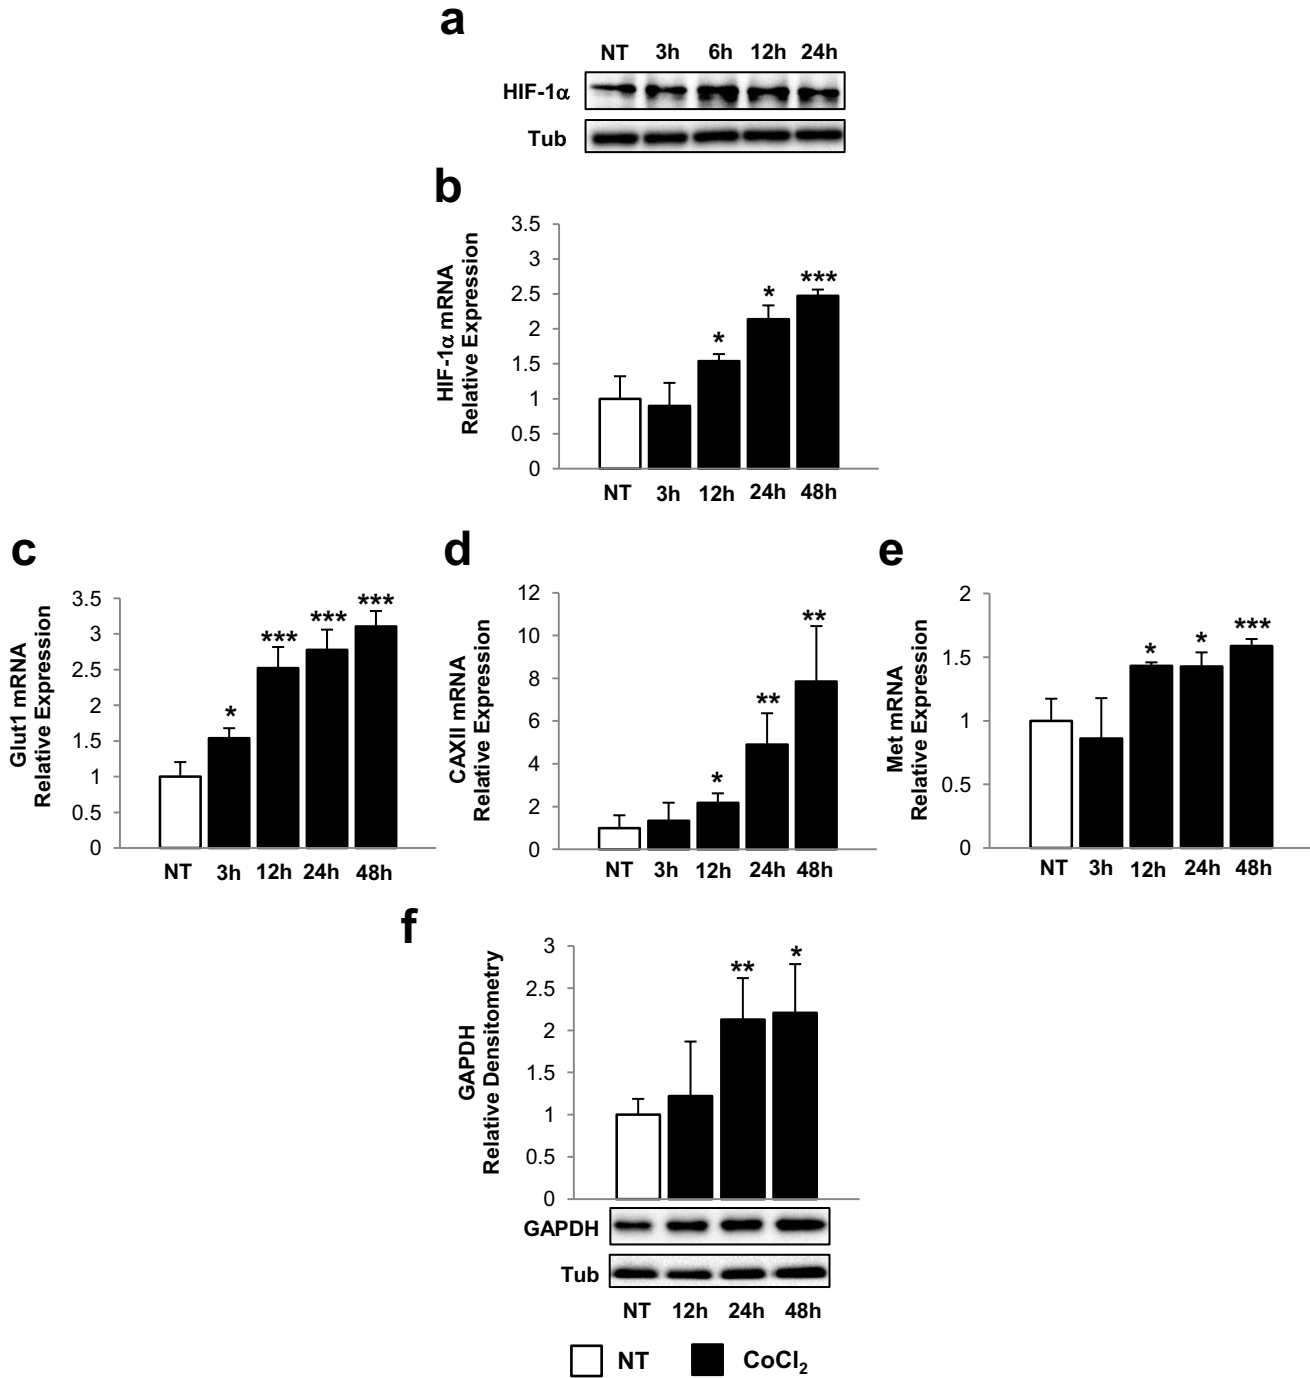

**Supplementary Figure S3** CoCl<sub>2</sub> induces HIF-1 $\alpha$  protein stabilization and mRNA up-regulation of its target genes in H9c2 cardiomyoblasts. Cells were treated with 300 $\mu$ M of CoCl<sub>2</sub> (black) for different lengths of time. (a) WB of HIF-1 $\alpha$  protein. Tubulin is showed as loading control. HIF-1 $\alpha$  (b), GLUT1 (c), CAXII (d) and Met (e) mRNA expression levels were analysed and normalized using the  $\beta$ -actin. (f) WB of GAPDH protein, normalized using tubulin. The values are expressed as fold relative to NT (white) and are the mean  $\pm$  SD of three independent experiments. T-test was calculated between treated samples vs NT. In (e) one-tailed T-test was significant. \* $p$ <0.05, \*\* $p$ <0.01 and \*\*\* $p$ <0.005.

# Supplementary Figure S4

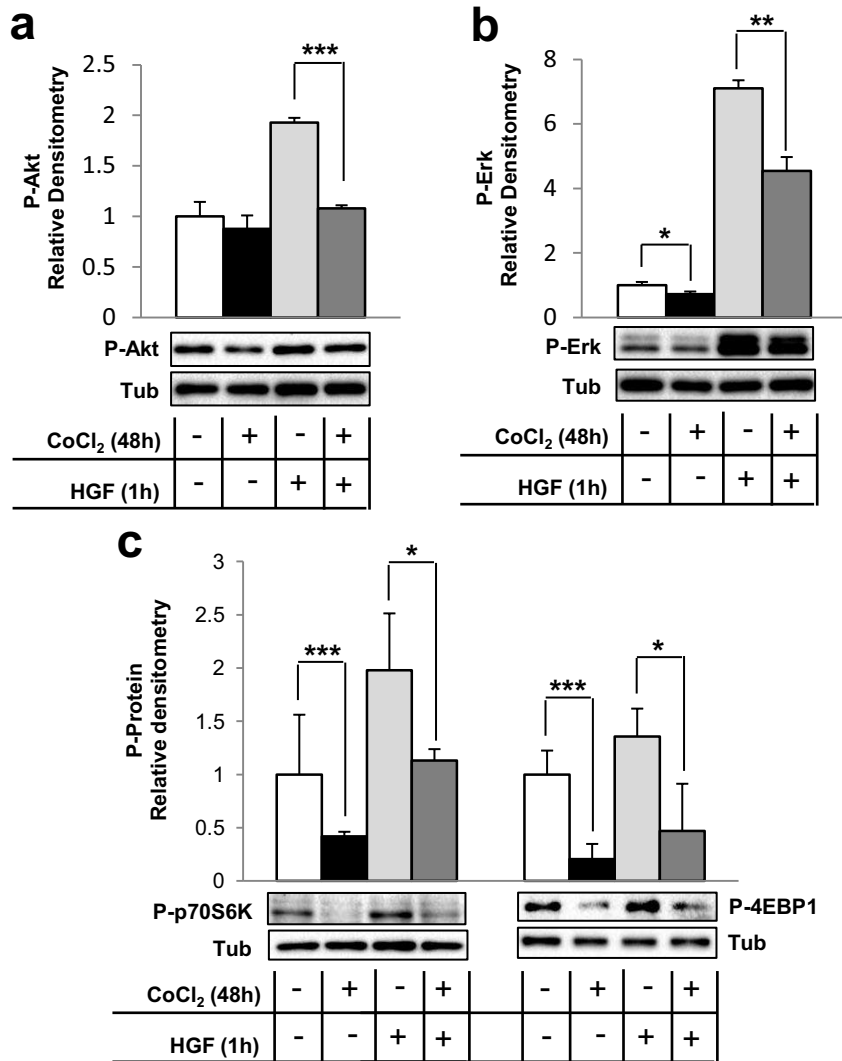

**Supplementary Figure S4** CoCl<sub>2</sub> treatment decreases the prosurvival pathways Akt, Erk and mTOR and impairs the response to HGF. H9c2 cells were untreated (white) or treated with 300μM CoCl<sub>2</sub> (black), HGF (0.5nM, light grey) or HGF+CoCl<sub>2</sub> (dark grey). Cells were treated for 48h and HGF was added in the last 1h. P-Akt (a), P-Erk (b), P-p70S6K and P-4EBP1 (c) protein levels were analysed by WB densitometry. Tubulin was used as loading control. Representative images are shown below each graph. The values are expressed as fold relative to NT and are the mean ± SD of three independent experiments. T-test was calculated between NT vs CoCl<sub>2</sub> and HGF vs HGF+CoCl<sub>2</sub>. \*p<0.05, \*\*p<0.01 and \*\*\*p<0.005.

## Supplementary Figure S5

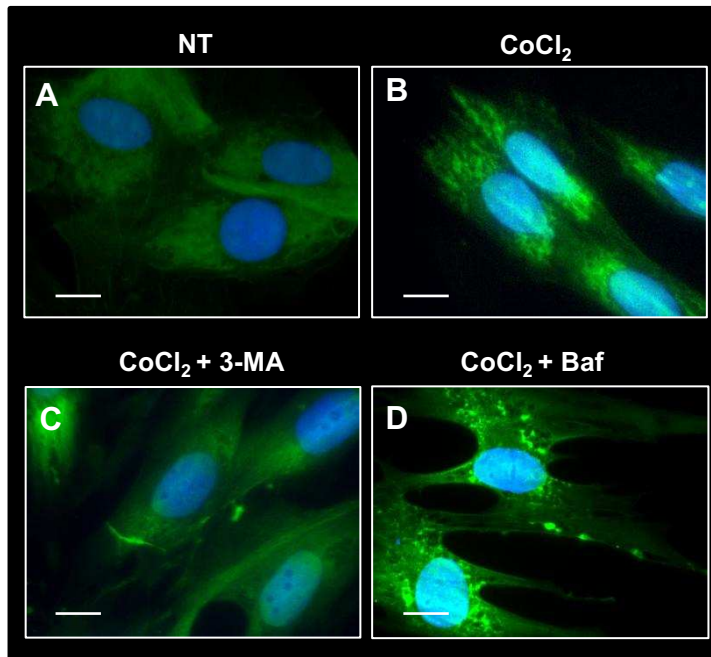

**Supplementary Figure S5** CoCl<sub>2</sub> induces autophagosome formation and maturation. Immunofluorescence images of LC3 autophagic marker (green) in H9c2 cells untreated (A) or treated with 300 μM CoCl<sub>2</sub> alone (B), CoCl<sub>2</sub>+3-MA (C) or CoCl<sub>2</sub>+Baf (D) for 48h. 3-MA and Baf were added in the last 12h and 6h, respectively. DAPI-stained nuclei in blue. Bar: 17 μm.

**Supplementary Table S1.** Antibodies used throughout the study.

| <b>Primary Antibody</b>     | <b>Company</b>              | <b>Dilution</b> | <b>Product n.</b> | <b>Exp</b> |
|-----------------------------|-----------------------------|-----------------|-------------------|------------|
| Met                         | Santa Cruz                  | 1:1000          | SP-260            | IP         |
| Gab1                        | Millipore                   | 1:1000/ 5ug     | 06-579            | IP         |
| P-Met (TyR 1234/1235)       | Upstate                     | 1:1000          |                   | IP         |
| P-Tyrosines                 | Santa Cruz                  | 1:1000          | PY99              | IP         |
| Bax                         | Santa Cruz                  | 1:1000          | sc-7480           | WB         |
| Bcl-2                       | BD Biosciences              | 1:1000          | pS70              | WB         |
| Total/Cleaved Caspase 3     | Cell Signaling              | 1:1000          | 9662              | WB         |
| Parp-1/2                    | Santa Cruz                  | 1:1000          | sc-7150           | WB         |
| Redd1 (RTP801)              | Sigma                       | 1:1000          | PRS4509           | WB         |
| Bnip3                       | abcam                       | 1:1000          | ANa40             | WB         |
| P-AMPK thr172               | Sigma                       | 1:1000          | SAB4503754        | WB         |
| AMPK                        | Sigma                       | 1:1000          | SAB4502329        | WB         |
| P-P70s6K thr389             | Cell Signaling              | 1:1000          | 92052             | WB         |
| p70s6k                      | New England BioLabs         | 1:1000          |                   | WB         |
| P-4ebp1 ser65               | Cell Signaling              | 1:1000          | 9451              | WB         |
| 4ebp1                       | Santa Cruz                  | 1:1000          | sc-9977           | WB         |
| Beclin1                     | Sigma                       | 1:1000          | B6186             | WB         |
| LC3B                        | Sigma                       | 1:1000/1:200    | L7543             | WB/IF      |
| p62                         | Sigma                       | 1:1000          | P0067             | WB         |
| HIF-1 $\alpha$              | Novus Biologicals           | 1:1000          | NB-100-479        | WB         |
| GAPDH                       | Open biosystems             | 1:1000          | TAB1001           | WB         |
| $\alpha$ -tubulin           | Sigma                       | 1:1000          | B-5-1-2           | WB         |
| Met                         | Zymed                       | 1:200           | 3D4               | IF         |
| Connexin 43                 | Sigma                       | 1:200           | C6219             | IF         |
| Troponin-I                  | Millipore                   | 1:200           | 1691              | IF         |
|                             |                             |                 |                   |            |
| <b>Secondary Antibody</b>   |                             |                 |                   |            |
| Goat anti-mouse IG          | Amersham                    | 1:1000          | 31430             | WB         |
| Goat anti-rabbit IG         | Amersham                    | 1:1000          | 31460             | WB         |
| Alexa Fluor 488 anti-mouse  | Molecular Probes/Invitrogen | 1:500           |                   | IF         |
| Alexa Fluor 488 anti-rabbit | Molecular Probes/Invitrogen | 1:500           |                   | IF         |
| Alexa Fluor 546 anti-mouse  | Molecular Probes/Invitrogen | 1:500           |                   | IF         |

**Supplementary Table S2.** Primers used throughout the study.

| <b>Gene</b>                      | <b>Forward</b>               | <b>Reverse</b>              | <b>Tm (°C)</b> | <b>Size (bp)</b> |
|----------------------------------|------------------------------|-----------------------------|----------------|------------------|
| Redd1 <sub>RT-PCR</sub>          | 5'-GCCGGAGGAAGACTCCTCATA     | 5'-CATCAGGTTGGCACACAGGT     | 63             | 97               |
| Bnip3 <sub>RT-PCR</sub>          | 5'-GCCATTGGATTGGGGATCTAC     | 5'-ACTGTGTGAGCAGAAGGCAG     | 63             | 92               |
| Redd1 <sub>SQ-PCR</sub>          | 5'-CTTGCCGCAATCTTCGCTG       | 5'-TATGAGGAGTCTTCCTCCGGC    | 60             | 298              |
| Bnip3 <sub>SQ-PCR</sub>          | 5'-TACCTCTCAGTGGTCACTTC      | 5'-GTGGGTGTCAATTCAGCTC      | 60             | 297              |
| Beclin1                          | 5'-CGCCTCCTATTCCATCAAAA      | 5'-AACTGTGAGGACACCCAAGC     | 60             | 111              |
| LC3                              | 5'-CACTGCTCTGTCTTGTGTAGGTTG  | 5'-TCGTTGTGCCTTTATTAGTGCATC | 65             | 170              |
| p62                              | 5'-CCCAGTGTCTTGGCATTCTT      | 5'-AGGAAAAGCAGAGGAAGCTC     | 60             | 154              |
| HIF-1 $\alpha$                   | 5'-GCTTGGTGCTGTTTGTGAACC     | 5'-GCATCCTGTACTGTCCTGTGGTG  | 64             | 267              |
| GLUT1                            | 5'-CAGAAGGTAATTGAGGAGTTCTACA | 5'-ACAAAGGCCAACAGGTTTCATC   | 60             | 206              |
| CAXII                            | 5'-CAGCCATCAAGAAGGAGG        | 5'-ACTCCTGCCCCCTAGTTC       | 58             | 256              |
| Met                              | 5'-ACACCGTGGCGTGCCAACAT      | 5'-TCGCCGCCGTTTCAGCTTCAG    | 55             | 364              |
| $\beta$ -actin <sub>SQ-PCR</sub> | 5'-CACGATGGAGGGGCCGACTCAT    | 5'-TAAAGACCTCTATGCCAACACAG  | 63             | 241              |
| $\beta$ -actin <sub>RT-PCR</sub> | 5'-CGCGAGTACAACCTTCTTGC      | 5'-CGTCATCCATGGCGAACTGG     | 63             | 70               |
